# Supplementary material
Source: Elsevier journal article supplement (https://www.sciencedirect.com/science/article/pii/S0021755720302102)
Supplement: mmc1 [file S0021755720302102:mmc1.docx]

JPED-D-20-00137 **Supplementary material**

**Figure S1 - ROC curve for predicting significant hyperbilirubinemia using t**

**he uCB.**


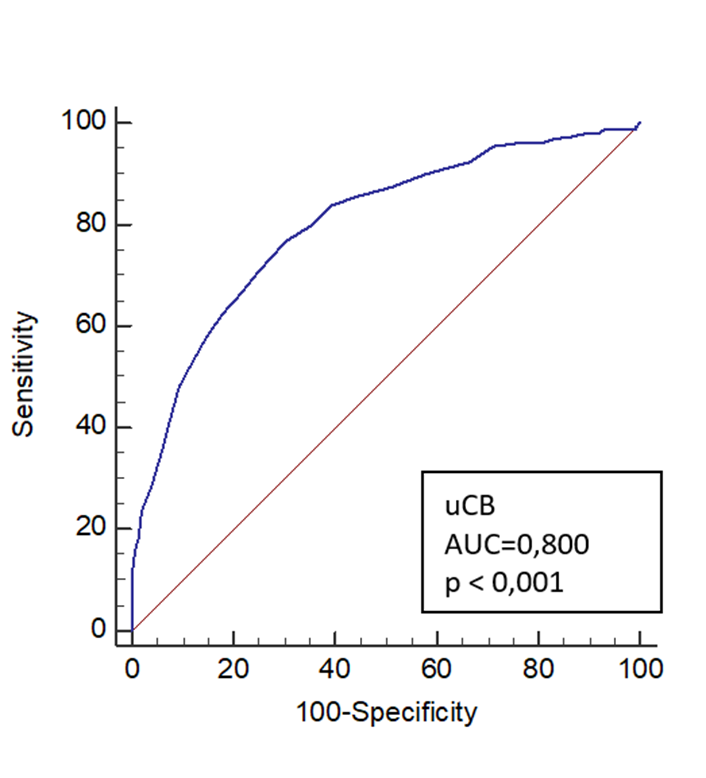


uCB, umbilical cord bilirubin; AUC, area under the curve.
